# Supplementary material for: Nanopore-Based Comparative Transcriptome Analysis Reveals the Potential Mechanism of High-Temperature Tolerance in Cotton (Gossypium hirsutum L.)
Source: MDPI journal article supplement (doi:10.3390/plants10112517), 2021-11-19
Supplement: s1 [file s1]

**Table S2.** Statistics of the clean data in each library

| Sample | N50 Length | Mean Length | Max Length | Mean Q score |
|--------|------------|-------------|------------|--------------|
| R0-r1  | 1001       | 943         | 11965      | 11           |
| R0-r2  | 1000       | 948         | 12735      | 11           |
| R0-r3  | 981        | 922         | 12006      | 11           |
| R12-r1 | 1153       | 1052        | 31126      | 11           |
| R12-r2 | 1081       | 1000        | 12235      | 11           |
| R12-r3 | 1153       | 1055        | 16209      | 11           |
| R4-r1  | 1031       | 991         | 13626      | 11           |
| R4-r2  | 986        | 927         | 12164      | 11           |
| R4-r3  | 1015       | 968         | 17650      | 11           |
| R8-r1  | 1070       | 1005        | 12204      | 11           |
| R8-r2  | 1131       | 1057        | 14250      | 11           |
| R8-r3  | 1130       | 1053        | 12178      | 11           |
| T0-r1  | 939        | 883         | 29910      | 11           |
| T0-r2  | 927        | 882         | 53252      | 11           |
| T0-r3  | 943        | 888         | 28140      | 11           |
| T12-r1 | 992        | 943         | 10939      | 11           |
| T12-r2 | 1037       | 972         | 10084      | 11           |
| T12-r3 | 987        | 940         | 9406       | 11           |
| T4-r1  | 967        | 914         | 46105      | 10           |
| T4-r2  | 962        | 911         | 32915      | 11           |
| T4-r3  | 1012       | 961         | 10978      | 11           |
| T8-r1  | 1040       | 973         | 12100      | 11           |
| T8-r2  | 1039       | 975         | 10385      | 11           |
| T8-r3  | 1003       | 950         | 12219      | 11           |
