# Supplementary material for: Nanopore-Based Comparative Transcriptome Analysis Reveals the Potential Mechanism of High-Temperature Tolerance in Cotton (Gossypium hirsutum L.)
Source: MDPI journal article supplement (doi:10.3390/plants10112517), 2021-11-19
Supplement: s1 [file s1]

**Table S3.** Full-length transcripts statistics in each sample.

| Sample | Number of clean reads | Number of full-length reads | Full-Length Percentage (%) |
|--------|-----------------------|-----------------------------|----------------------------|
| R0-r1  | 7,458,544             | 5,796,611                   | 77.72%                     |
| R0-r2  | 8,784,146             | 6,743,250                   | 76.77%                     |
| R0-r3  | 8,806,212             | 6,761,816                   | 76.78%                     |
| R12-r1 | 9,406,255             | 7,545,051                   | 80.21%                     |
| R12-r2 | 8,998,475             | 7,269,454                   | 80.79%                     |
| R12-r3 | 8,160,985             | 6,642,112                   | 81.39%                     |
| R4-r1  | 7,190,038             | 5,450,625                   | 75.81%                     |
| R4-r2  | 8,062,262             | 6,380,621                   | 79.14%                     |
| R4-r3  | 7,413,865             | 5,693,959                   | 76.80%                     |
| R8-r1  | 8,229,395             | 6,528,872                   | 79.34%                     |
| R8-r2  | 7,357,241             | 5,690,484                   | 77.35%                     |
| R8-r3  | 7,961,439             | 6,296,224                   | 79.08%                     |
| T0-r1  | 7,953,896             | 6,384,761                   | 80.27%                     |
| T0-r2  | 8,311,046             | 6,507,387                   | 78.30%                     |
| T0-r3  | 8,035,449             | 6,327,212                   | 78.74%                     |
| T12-r1 | 7,127,052             | 5,744,429                   | 80.60%                     |
| T12-r2 | 6,509,499             | 5,088,906                   | 78.18%                     |
| T12-r3 | 7,180,722             | 5,731,610                   | 79.82%                     |
| T4-r1  | 7,791,760             | 6,027,909                   | 77.36%                     |
| T4-r2  | 8,212,003             | 6,362,641                   | 77.48%                     |
| T4-r3  | 7,792,607             | 6,161,558                   | 79.07%                     |
| T8-r1  | 6,799,663             | 5,497,080                   | 80.84%                     |
| T8-r2  | 6,994,128             | 5,698,753                   | 81.48%                     |
| T8-r3  | 6,992,522             | 5,582,299                   | 79.83%                     |
