# Supplementary material for: Nanopore-Based Comparative Transcriptome Analysis Reveals the Potential Mechanism of High-Temperature Tolerance in Cotton (Gossypium hirsutum L.)
Source: MDPI journal article supplement (doi:10.3390/plants10112517), 2021-11-19
Supplement: s1 [file s1]

Table S5 DEG statistics in each comparison group

| <b>DEG set</b>    | <b>DEG Number</b> | <b>up-regulated</b> | <b>down-regulated</b> |
|-------------------|-------------------|---------------------|-----------------------|
| <b>R0_vs_R12</b>  | 8,870             | 4,369               | 4,501                 |
| <b>R0_vs_R4</b>   | 2,764             | 1,671               | 1,093                 |
| <b>R0_vs_R8</b>   | 5,179             | 2,302               | 2,877                 |
| <b>R0_vs_T0</b>   | 365               | 174                 | 191                   |
| <b>R12_vs_T12</b> | 3,201             | 1,355               | 1,846                 |
| <b>R4_vs_R8</b>   | 1,438             | 385                 | 1,053                 |
| <b>R4_vs_T4</b>   | 2,303             | 996                 | 1,307                 |
| <b>R8_vs_R12</b>  | 3,520             | 2,280               | 1,240                 |
| <b>R8_vs_T8</b>   | 1,339             | 705                 | 634                   |
| <b>T0_vs_T12</b>  | 6,480             | 3,597               | 2,883                 |
| <b>T0_vs_T4</b>   | 4,582             | 2,527               | 2,055                 |
| <b>T0_vs_T8</b>   | 4,260             | 1,821               | 2,439                 |
| <b>T4_vs_T8</b>   | 6,521             | 3,030               | 3,491                 |
| <b>T8_vs_T12</b>  | 927               | 639                 | 288                   |
| <b>Total</b>      | 19,600            | --                  | --                    |
