# Supplementary material for: Nanopore-Based Comparative Transcriptome Analysis Reveals the Potential Mechanism of High-Temperature Tolerance in Cotton (Gossypium hirsutum L.)
Source: MDPI journal article supplement (doi:10.3390/plants10112517), 2021-11-19
Supplement: s1 [file s1]

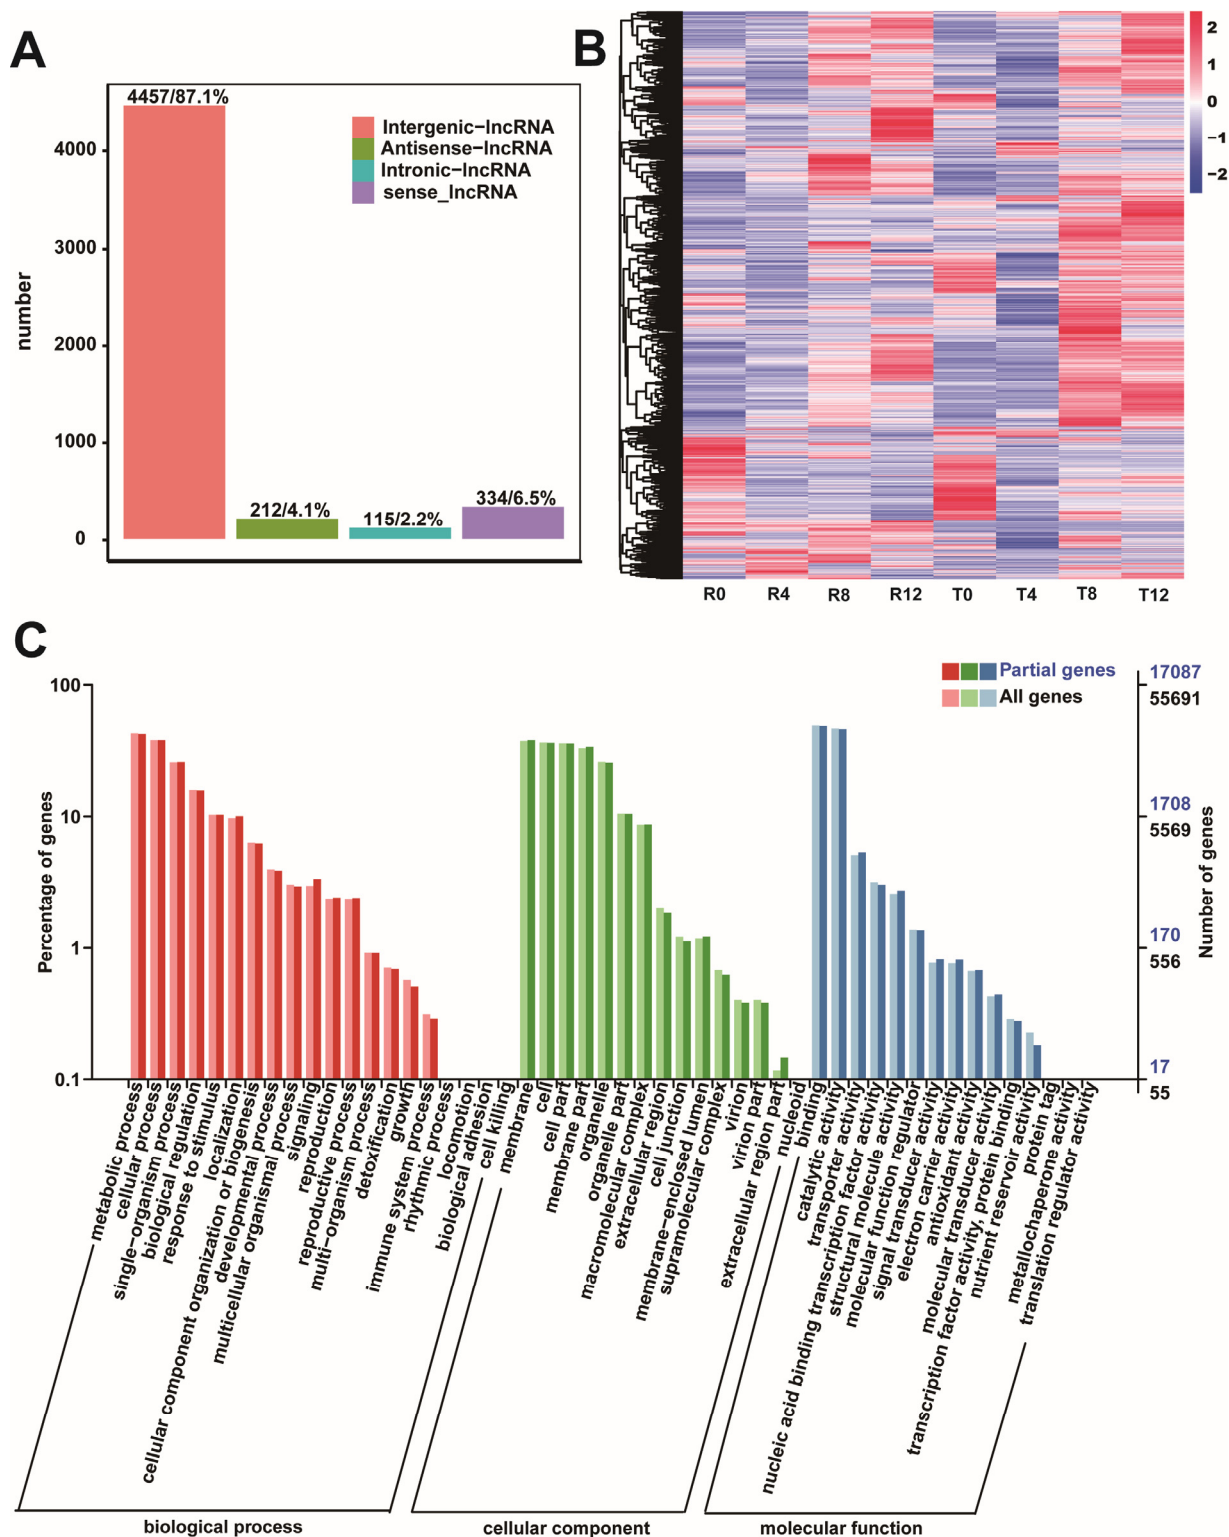

**Figure S4.** Analysis of the predicted lncRNAs and their target genes. **A:** Statistics of the lncRNA types; **B:** Expression profile of the lncRNAs; **C:** GO enrichment of the target genes.
