# Supplementary material for: Nanopore-Based Comparative Transcriptome Analysis Reveals the Potential Mechanism of High-Temperature Tolerance in Cotton (Gossypium hirsutum L.)
Source: MDPI journal article supplement (doi:10.3390/plants10112517), 2021-11-19
Supplement: s1 [file s1]

Table S1 Primers for RT-qPCR

| Gene               | Sequence               |
|--------------------|------------------------|
| GH_A10G1076.gene-F | TGTTACACGGCAGATGATGCT  |
| GH_A10G1076.gene-R | TTTCCCCATCCACGTGCTAC   |
| GH_D10G1805.gene-F | GAAGGGTTGAAGAGCGTGGA   |
| GH_D10G1805.gene-R | AGGAAACGCCGGTAAGAGTC   |
| GH_D01G2035.gene-F | TACTGGTGCTGTGGTTTCGTG  |
| GH_D01G2035.gene-R | GCTGCACTTTGCAACTCCTT   |
| GH_A12G2244.gene-F | ATCGAAGTGCTGCCAACTCA   |
| GH_A12G2244.gene-R | TGCCAGGGTAAGAGCAAGTG   |
| GH_A09G0088.gene-F | CGAAAGCATCGGTGGAGAGT   |
| GH_A09G0088.gene-R | TCATCCGACAGTCCAAACCG   |
| GH_D05G0316.gene-F | TTATTGGTTGTGGTCCGGCT   |
| GH_D05G0316.gene-R | ACTATGGTGTCCCGCCAAAC   |
| GH_D08G2157.gene-F | CTGGCTTAGGTTCCGAGTCC   |
| GH_D08G2157.gene-R | ACGCACATAGAATCCGCCAA   |
| GH_D13G1471.gene-F | CTGATTGGAAATTCGCCGGG   |
| GH_D13G1471.gene-R | CCCCACATTCGATGGGCATA   |
| GH_A02G0791.gene-F | AAGCAAGGGTTGCTACTGCT   |
| GH_A02G0791.gene-R | AACCGCGGGTGATATGGTTT   |
| GH_A13G1534.gene-F | ATAAAGCTGGTGCGCGTTTC   |
| GH_A13G1534.gene-R | ACCTCAGGCTCAACAATGGG   |
| GH_A11G1702.gene-F | TCTCATCGGCTACCATTGCC   |
| GH_A11G1702.gene-R | CATGCATTGCACTCTACCGC   |
| GH_D11G1742.gene-F | CGATCTTACACCCGTGCAGT   |
| GH_D11G1742.gene-R | TTCCACATGGTCCAGTAGCG   |
| GH_A03G1577.gene-F | AAGCCACTGACTTTCCCTCG   |
| GH_A03G1577.gene-R | AGCAACCTCCTTCCTAACGC   |
| GH_D01G0967.gene-F | CACCAGGATTCGTGCTGCTA   |
| GH_D01G0967.gene-R | GCCTTGACAACCTGAATGCC   |
| GH_D12G0630.gene-F | GGCCTCAATCGGGCTAGAAA   |
| GH_D12G0630.gene-R | CCGGGGACTATGTTCTGCTC   |
| GH_D02G1748.gene-F | CGTCAGGTGGTTGCTTTGTG   |
| GH_D02G1748.gene-R | AGGATACCCATCACGCCCTCT  |
| GH_A12G0256.gene-F | TGAGTGCCCAGATGACGTTT   |
| GH_A12G0256.gene-R | AAACCAGCGGCAATTTGGTC   |
| GH_D12G0262.gene-F | AAGCTGGTGACTCCTGATGG   |
| GH_D12G0262.gene-R | ATCCGACTGATCCACACTGC   |
| GH_D07G1195.gene-F | TCATCCCCACCGAACAACAC   |
| GH_D07G1195.gene-R | CAATCCATCCGATCAGCCCA   |
| GH_A12G1558.gene-F | AACCCCAACTTCCAAGCTCAA  |
| GH_A12G1558.gene-R | AACCCCTCCAAGAGCAAGAC   |
| GH_A06G1891.gene-F | GCGTCACATTTCTTCGGGAC   |
| GH_A06G1891.gene-R | TCGCATTGGGGAACCAAACA   |
| GH_A04G0248.gene-F | TTGGGACACTGCTGGTTTGT   |
| GH_A04G0248.gene-R | GAGCTCCTGCCTTGAACCAT   |
| GH-SSU-F           | AACTTAAAGGAATTGACGGAAG |
| GH-SSU-R           | GCATCACAGACCTGTTATTGCC |
