# Supplementary material for: Nanopore-Based Comparative Transcriptome Analysis Reveals the Potential Mechanism of High-Temperature Tolerance in Cotton (Gossypium hirsutum L.)
Source: MDPI journal article supplement (doi:10.3390/plants10112517), 2021-11-19
Supplement: s1 [file s1]

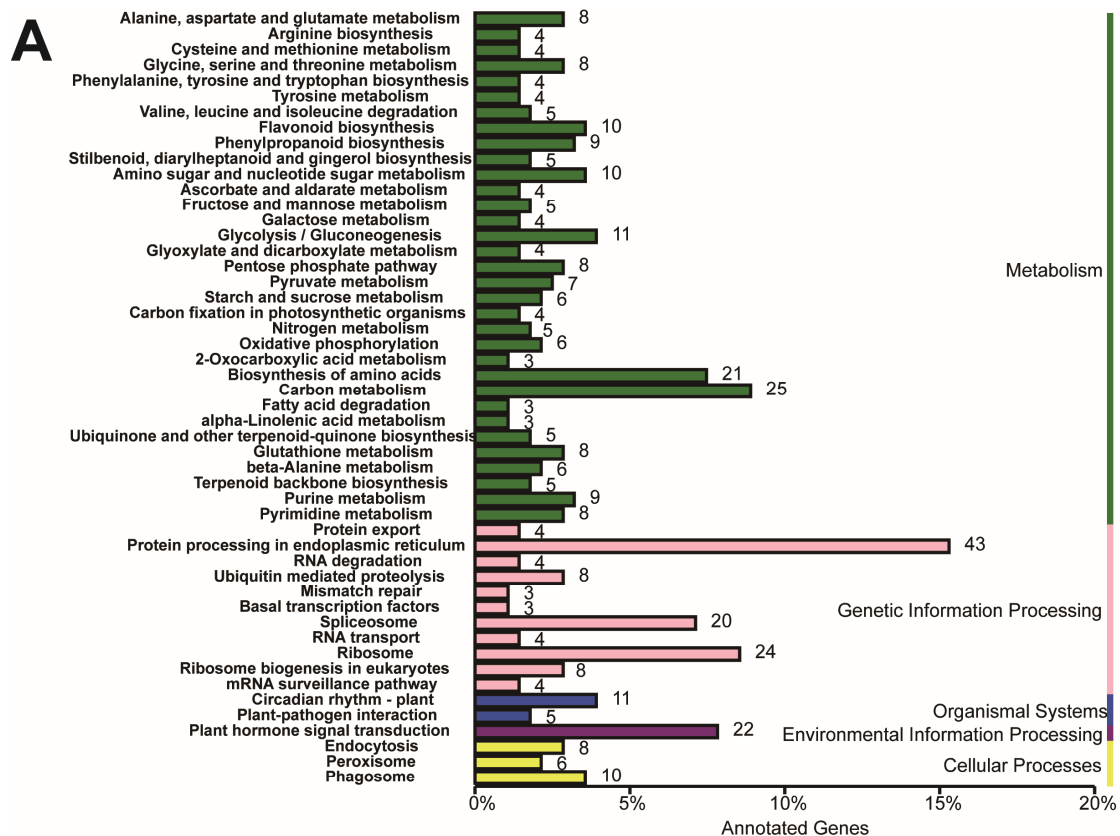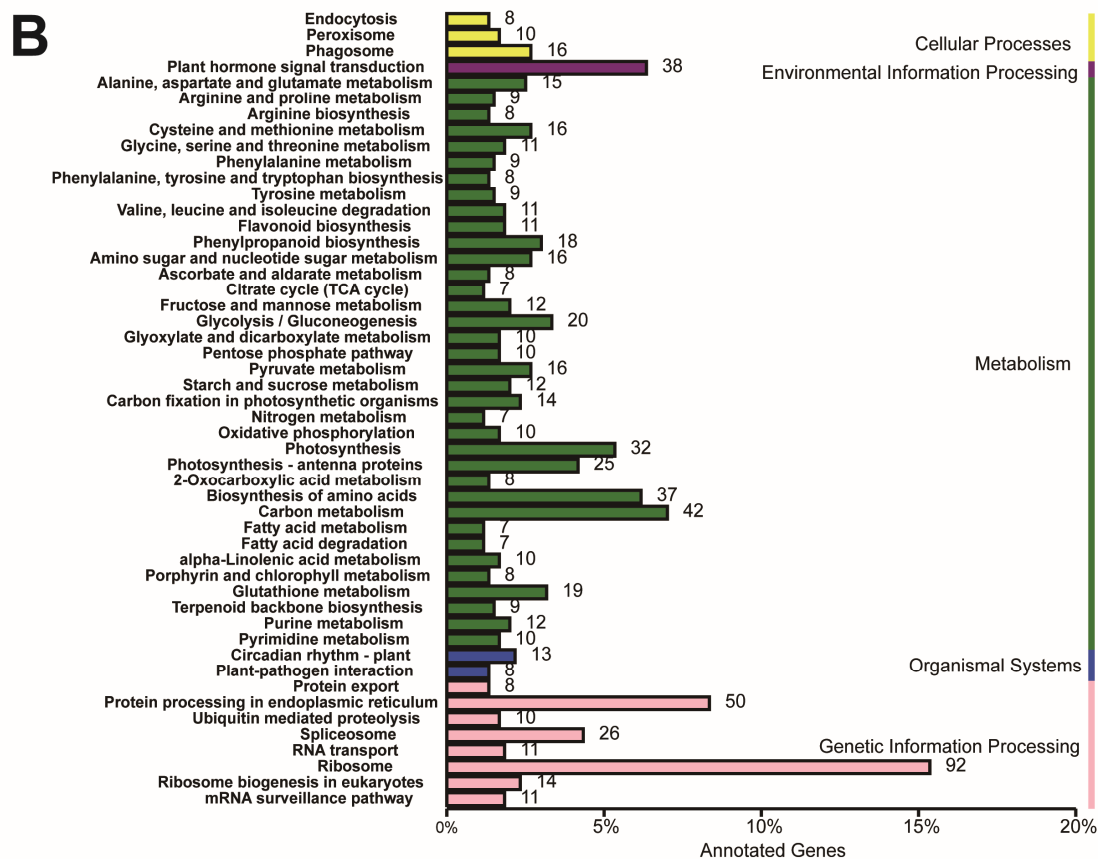

**Figure S3.** KEGG pathway enrichment of the DEGs from the intra-groups of the sensitive (A) and tolerant (B) cotton cultivars
