# Supplementary material for: Nanopore-Based Comparative Transcriptome Analysis Reveals the Potential Mechanism of High-Temperature Tolerance in Cotton (Gossypium hirsutum L.)
Source: MDPI journal article supplement (doi:10.3390/plants10112517), 2021-11-19
Supplement: s1 [file s1]

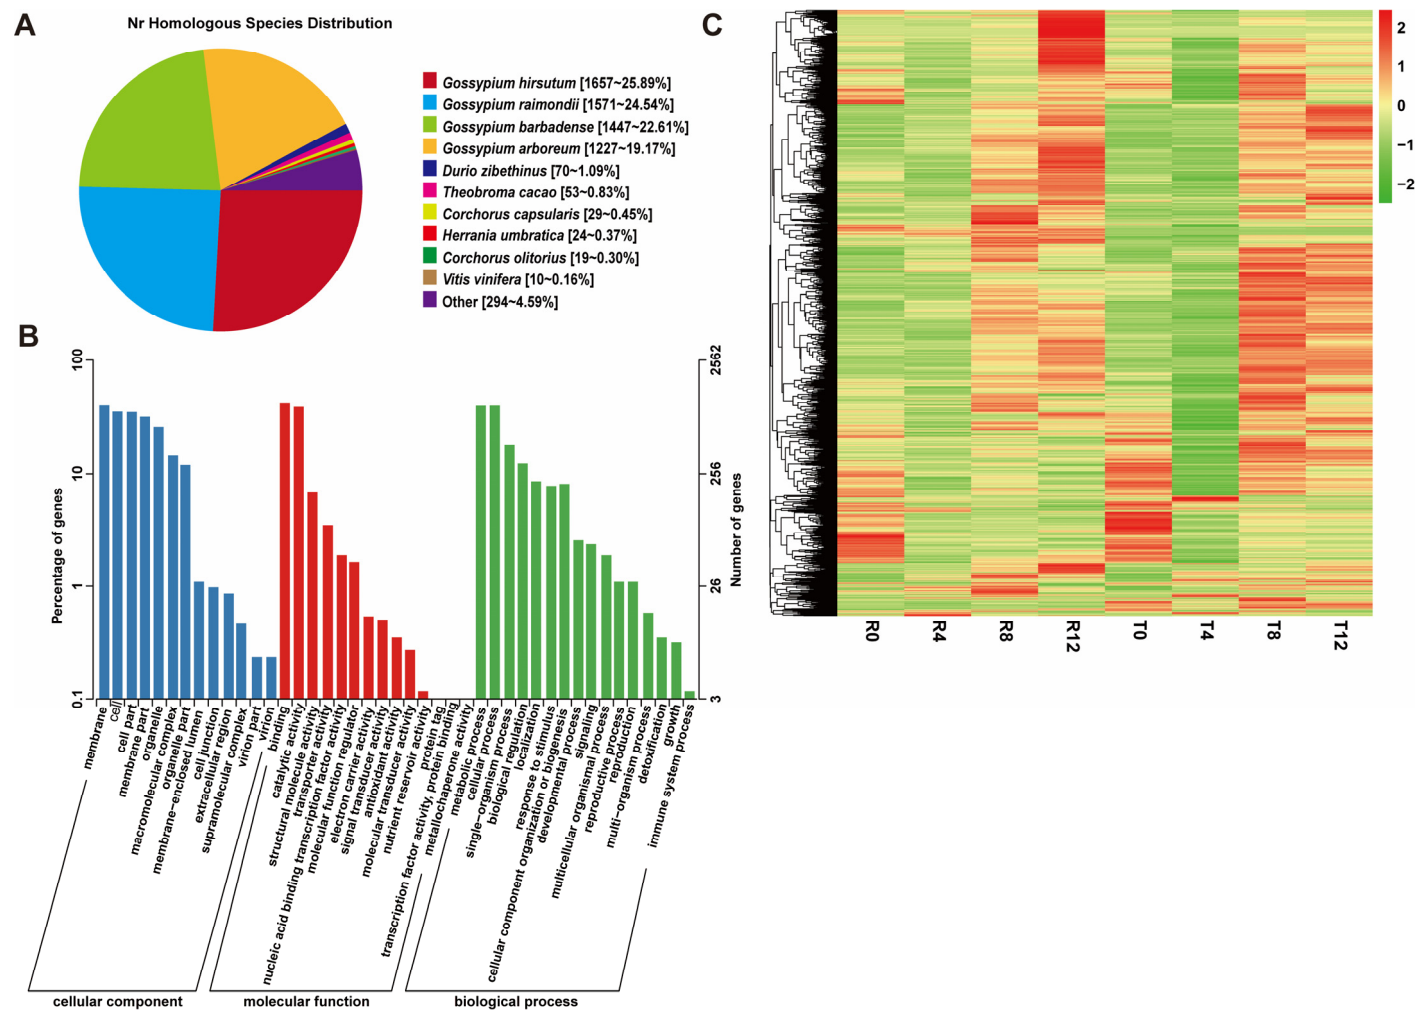

**Figure S1.** Annotation analysis of the new genes. **A:** Homogeneous analysis of the Nr species distribution; **B:** GO term statistics of the annotated genes; **C:** Expression profile of the new genes.
