# Supplementary material for: Nanopore-Based Comparative Transcriptome Analysis Reveals the Potential Mechanism of High-Temperature Tolerance in Cotton (Gossypium hirsutum L.)
Source: MDPI journal article supplement (doi:10.3390/plants10112517), 2021-11-19
Supplement: s1 [file s1]

**Table S4** New gene annotation statistics

| Annotation<br>Database | COG | GO    | KEGG  | KOG   | Pfam  | eggNOG | Swissprot | Nr    | All   |
|------------------------|-----|-------|-------|-------|-------|--------|-----------|-------|-------|
| Annotated<br>Number    | 750 | 2,562 | 1,536 | 2,494 | 1,167 | 3,830  | 2,588     | 6,402 | 6,415 |
