# Supplementary figures and images for: Nanopore-Based Comparative Transcriptome Analysis Reveals the Potential Mechanism of High-Temperature Tolerance in Cotton (Gossypium hirsutum L.)
Source: MDPI journal article supplement (doi:10.3390/plants10112517), 2021-11-19

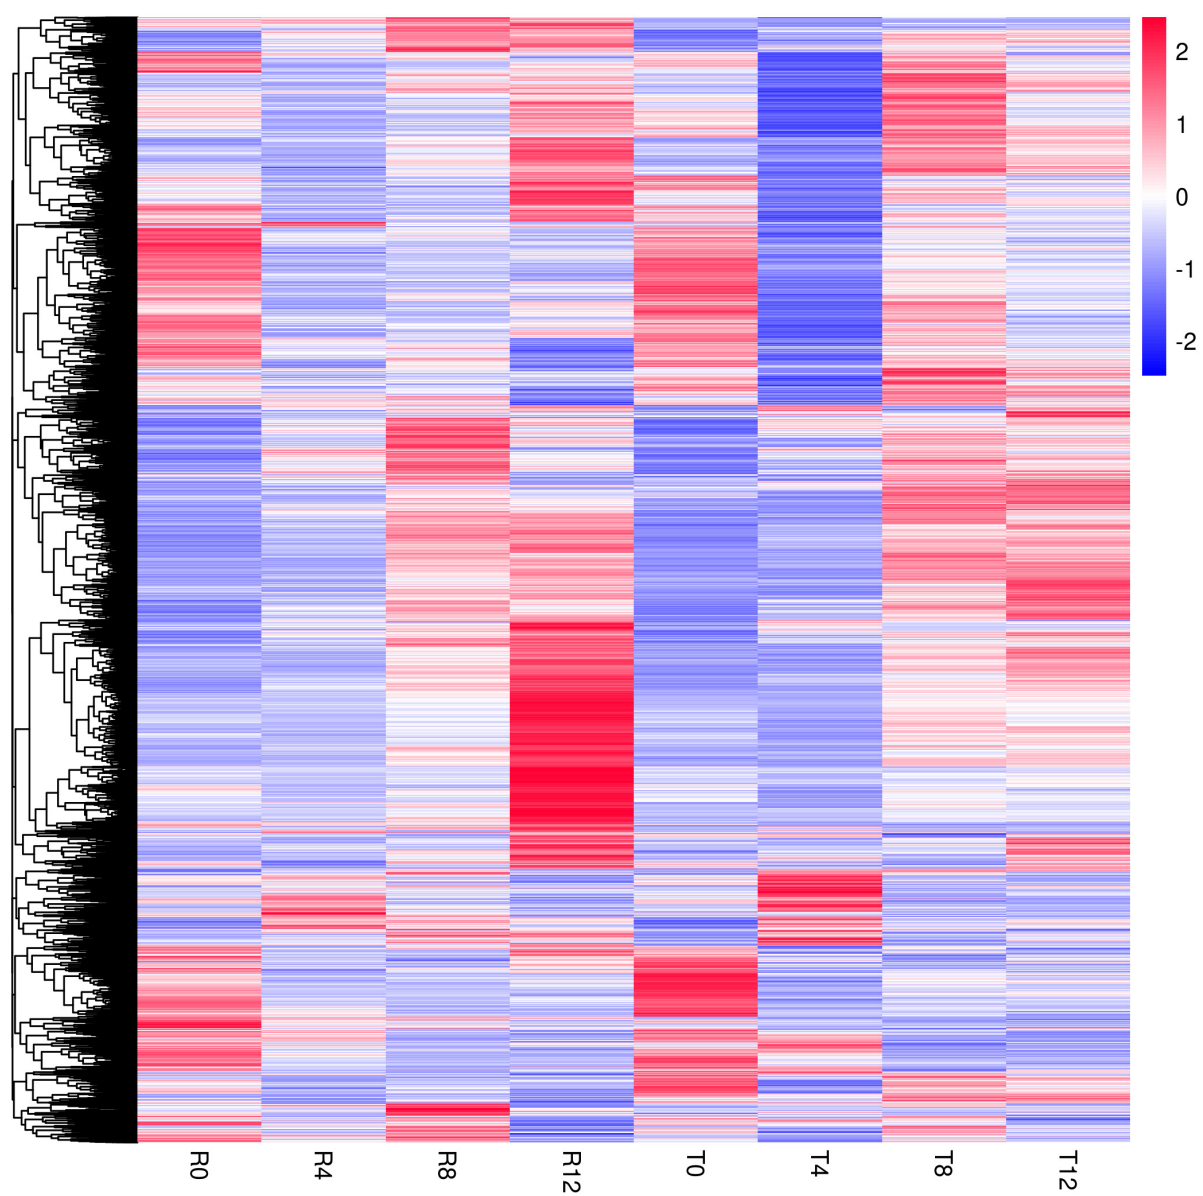

**Figure S2.** Expression heatmap of all the DEGs.

Supplement: s1 [file s1]
